# Supplementary material
Source: PubMed Central journal article supplement (PMC10140159)
Supplement: 41467_2023_38039_MOESM1_ESM.pdf [file 41467_2023_38039_MOESM1_ESM.pdf]

## Engineering Protein-Based Therapeutics Through Structural and Chemical Design

Sasha B. Ebrahimi<sup>1,\*</sup> and Devleena Samanta<sup>2,\*</sup>

<sup>1</sup>Drug Product Development – Steriles, GlaxoSmithKline, Collegeville, PA 19426, USA

<sup>2</sup>Department of Chemistry, The University of Texas at Austin, Austin, TX 78712, USA

\*Corresponding author email: [sasha.b.ebrahimi@gsk.com](mailto:sasha.b.ebrahimi@gsk.com), [dsamanta@utexas.edu](mailto:dsamanta@utexas.edu)

|                                                                                                    |   |
|----------------------------------------------------------------------------------------------------|---|
| <b>Supplementary Table 1.</b> Common FDA-approved variants of insulin .....                        | 2 |
| <b>Supplementary Table 2.</b> FDA-approved antibody-drug conjugates .....                          | 3 |
| <b>Supplementary Table 3.</b> Expanded list of protein-based therapeutics approved since 1982 .... | 4 |

All tables are created using information obtained from the PharmaCircle database.

**Supplementary Table 1.** Common FDA-approved variants of insulin

| <b>Therapeutic</b>                     | <b>Trade Name</b> | <b>Year of FDA Approval</b> |
|----------------------------------------|-------------------|-----------------------------|
| insulin, human recombinant             | Humulin           | 1982                        |
| insulin, human recombinant             | Novolin           | 1991                        |
| insulin lispro                         | Humalog           | 1996                        |
| insulin, human recombinant             | Velosulin         | 1999                        |
| insulin aspart                         | NovoLog           | 2000                        |
| insulin glargine                       | Lantus            | 2000                        |
| insulin glulisine                      | Apidra            | 2004                        |
| insulin detemir                        | Levemir           | 2005                        |
| insulin, human recombinant (inhalable) | Exubera           | 2006                        |
| insulin, human recombinant (inhalable) | Afrezza           | 2014                        |
| insulin degludec                       | Tresiba           | 2015                        |
| insulin glargine                       | Basaglar          | 2015                        |
| insulin glargine                       | Toujeo            | 2015                        |
| insulin aspart                         | Ryzodeg           | 2015                        |
| insulin aspart                         | Fiasp             | 2017                        |
| insulin lispro                         | Admelog           | 2017                        |
| insulin glargine                       | Lusduna           | 2017                        |
| insulin, human recombinant             | Myxredlin         | 2019                        |
| insulin lispro                         | Lyumjev           | 2020                        |
| insulin glargine-yfgn                  | Semglee           | 2020                        |
| insulin glargine-aglr                  | Rezvoglar         | 2021                        |

**Supplementary Table 2. FDA-approved antibody-drug conjugates**

| <b>Therapeutic</b>              | <b>Selected Trade Name</b> | <b>Selected Indications</b>                   | <b>Year of FDA Approval</b> |
|---------------------------------|----------------------------|-----------------------------------------------|-----------------------------|
| brentuximab vedotin             | Adcetris                   | cancer, Hodgkin lymphoma                      | 2011                        |
| trastuzumab emtansine           | Kadcyla                    | breast cancer                                 | 2013                        |
| inotuzumab ozogamicin           | Besponsa                   | acute lymphoblastic leukemia                  | 2017                        |
| gemtuzumab ozogamicin           | Mylotarg                   | cancer, acute myeloid leukemia                | 2017                        |
| moxetumomab pasudotox-tdfk      | Lumoxiti                   | hairy cell leukemia                           | 2018                        |
| fam-trastuzumab deruxtecan-nxki | Enhertu                    | breast cancer                                 | 2019                        |
| polatuzumab vedotin-piiq        | Polivy                     | cancer, diffuse large B-cell lymphoma (DLBCL) | 2019                        |
| enfortumab vedotin-ejfv         | Padcev                     | cancer, renal                                 | 2019                        |
| sacituzumab govitecan-hziy      | Trodelvy                   | breast cancer, triple-negative metastatic     | 2020                        |
| tisotumab vedotin               | Tivdak                     | cervical cancer                               | 2021                        |
| belantamab mafodotin            | Blenrep                    | cancer, multiple myeloma                      | 2021                        |
| loncastuximab tesirine-lpyl     | Zynlonta                   | cancer, DLBCL                                 | 2021                        |

**Supplementary Table 3.** Expanded list of protein-based therapeutics approved since 1982

| <b>Therapeutic</b>                               | <b>Selected Trade Names</b> | <b>Selected Indications</b>                         | <b>Year of FDA Approval</b> |
|--------------------------------------------------|-----------------------------|-----------------------------------------------------|-----------------------------|
| insulin, human recombinant                       | Humulin                     | diabetes                                            | 1982                        |
| somatrem                                         | Protropin                   | growth hormone (GH) deficiency                      | 1985                        |
| Interferon- $\alpha$ 2b                          | Intron A                    | cancer, hairy cell leukemia                         | 1986                        |
| interferon alfa 2a                               | Roferon                     | cancer, chronic myeloid leukemia                    | 1986                        |
| digoxin immune Fab                               | Digibind                    | intoxication/ poisoning                             | 1986                        |
| urofollitropin                                   | Metrodin                    | infertility                                         | 1986                        |
| anti-inhibitor coagulant complex                 | Feiba                       | hemophilia A                                        | 1986                        |
| muromonab-CD3                                    | Orthoclone OKT3             | organ transplantation                               | 1986                        |
| growth hormone, human recombinant (somatotropin) | Humatrope                   | GH deficiency                                       | 1987                        |
| alteplase                                        | Activase                    | myocardial infarction                               | 1987                        |
| interferon alfa-n3                               | Alferon N                   | genital warts                                       | 1989                        |
| epoetin alfa                                     | Procrit                     | anemia                                              | 1989                        |
| anistreplase                                     | Eminase                     | myocardial infarction                               | 1989                        |
| interferon- $\gamma$ 1b (IFN $\gamma$ )          | Actimmune                   | chronic granulomatous disease, osteoporosis         | 1990                        |
| pegademase, bovine                               | Adagen                      | severe combined immunodeficiency                    | 1990                        |
| filgrastim                                       | Neupogen                    | neutropenia                                         | 1991                        |
| sargramostim                                     | Leukine                     | bone marrow transplantation, stem cell mobilization | 1991                        |
| onabotulinumtoxin A                              | Botox                       | hyperhidrosis                                       | 1991                        |
| antithrombin III, human                          | Thrombate III               | antithrombin III deficiency                         | 1991                        |
| alglucerase                                      | Ceredase                    | Gaucher's disease                                   | 1991                        |
| insulin, human recombinant                       | Novolin                     | diabetes                                            | 1991                        |
| octocog alfa                                     | Recombinate                 | hemophilia A                                        | 1992                        |
| aldesleukin                                      | Proleukin                   | cancer, renal cell carcinoma, metastatic            | 1992                        |
| interferon- $\beta$ 1b (rIFN- $\beta$ )          | Betaseron, Extavia          | multiple sclerosis (MS)                             | 1993                        |
| dornase alfa                                     | Pulmozyme                   | cystic fibrosis/ respiratory tract infection        | 1993                        |
| octocog alfa                                     | Kogenate                    | hemophilia A                                        | 1993                        |
| menotropin                                       | Humegon                     | infertility                                         | 1994                        |
| pegaspargase                                     | Oncaspar                    | acute lymphoblastic leukemia                        | 1994                        |
| imiglucerase                                     | Cerezyme                    | Gaucher's disease                                   | 1994                        |
| abciximab                                        | ReoPro                      | cardiac ischemia                                    | 1994                        |
| growth hormone, human recombinant (somatotropin) | Genotropin                  | GH deficiency                                       | 1995                        |

|                                                  |                         |                                                              |      |
|--------------------------------------------------|-------------------------|--------------------------------------------------------------|------|
| growth hormone, human recombinant (somatotropin) | Norditropin             | idiopathic short stature                                     | 1995 |
| interferon- $\beta$ 1a (rIFN- $\beta$ )          | Avonex, Plegridy, Rebif | MS                                                           | 1996 |
| reteplase                                        | Retavase                | myocardial infarction                                        | 1996 |
| growth hormone, human recombinant (somatotropin) | Saizen                  | GH deficiency                                                | 1996 |
| growth hormone, human recombinant (somatotropin) | Serostim                | cachexia, AIDS-related                                       | 1996 |
| lipase<br>protease<br>amylase                    | Cotazym                 | exocrine pancreatic insufficiency                            | 1996 |
| Insulin lispro                                   | Humalog                 | diabetes                                                     | 1996 |
| interferon alfacon-1                             | Infergen                | hepatitis C                                                  | 1997 |
| folitropin alfa                                  | Gonal                   | <i>in vitro</i> fertilization                                | 1997 |
| nonacog alfa                                     | BeneFIX                 | hemophilia B                                                 | 1997 |
| oprelvekin                                       | Neumega                 | thrombocytopenia                                             | 1997 |
| becaplermin                                      | Regranex                | diabetic neuropathic ulcers                                  | 1997 |
| rituximab                                        | Rituxan                 | non-Hodgkin's lymphoma                                       | 1997 |
| daclizumab beta                                  | Zenapax                 | transplant rejection                                         | 1997 |
| etanercept                                       | Enbrel                  | juvenile arthritis                                           | 1998 |
| lepirudin                                        | Refludan                | thrombocytopenia                                             | 1998 |
| sacrosidase                                      | Sucraid                 | enzyme deficiency (congenital sucrase-isomaltase deficiency) | 1998 |
| trastuzumab                                      | Herceptin               | breast cancer                                                | 1998 |
| palivizumab                                      | Synagis                 | infections, RSV                                              | 1998 |
| basiliximab                                      | Simulect                | transplant rejection                                         | 1998 |
| infliximab                                       | Remicade                | Crohn's disease                                              | 1998 |
| poractant alfa                                   | Curosurf                | respiratory distress syndrome                                | 1999 |
| eptacog alfa                                     | NovoSeven               | hemophilia A                                                 | 1999 |
| growth hormone, human recombinant (somatotropin) | Nutropin                | GH deficiency, adult                                         | 1999 |
| denileukin diftitox                              | Ontak                   | cancer, CTCL cutaneous T-cell lymphoma                       | 1999 |
| moroctocog alfa                                  | Refacto                 | hemophilia A                                                 | 2000 |
| choriogonadotropin alfa                          | Ovidrel                 | ovulation induction                                          | 2000 |
| botulinum toxin type B                           | Myobloc                 | cervical dystonia                                            | 2000 |
| octocog alfa                                     | Helixate                | hemophilia A                                                 | 2000 |
| tenecteplase                                     | Tnkase                  | myocardial infarction                                        | 2000 |
| insulin aspart                                   | NovoLog                 | diabetes                                                     | 2000 |
| insulin glargine                                 | Lantus                  | diabetes                                                     | 2000 |
| peginterferon alfa-2b                            | PEGIntron               | hepatitis C                                                  | 2001 |
| darbepoetin alfa                                 | Aranesp                 | anemia associated with renal failure                         | 2001 |

|                                                  |                                      |                                                                            |      |
|--------------------------------------------------|--------------------------------------|----------------------------------------------------------------------------|------|
| anakinra                                         | Kineret                              | inflammation/immune (deficiency of interleukin-1 receptor antagonist )     | 2001 |
| drotrecogin alfa (activated)                     | Xigris                               | sepsis                                                                     | 2001 |
| digoxin immune Fab                               | DigiFab                              | intoxication/poisoning                                                     | 2001 |
| alemtuzumab                                      | Lemtrada (Originally called Campath) | MS                                                                         | 2001 |
| interferon- $\beta$ 1a (rIFN- $\beta$ )          | Avonex, Plegridy, Rebif              | MS                                                                         | 2002 |
| pegylated interferon alfa-2a                     | Pegasys                              | hepatitis B, C                                                             | 2002 |
| rasburicase                                      | Elitek                               | hyperuricemia                                                              | 2002 |
| pegfilgrastim                                    | Neulasta                             | neutropenia                                                                | 2002 |
| dibotermin alfa                                  | Infuse                               | fractures                                                                  | 2002 |
| urofollitropin                                   | Bravelle                             | infertility                                                                | 2002 |
| adalimumab                                       | Humira                               | rheumatoid arthritis                                                       | 2002 |
| alefacept                                        | Amevive                              | psoriasis                                                                  | 2003 |
| growth hormone, human recombinant (somatotropin) | Zorbtive                             | short bowel syndrome                                                       | 2003 |
| collagen                                         | CosmoDerm                            | skin wrinkles                                                              | 2003 |
| pegvisomant                                      | Somavert                             | acromegaly                                                                 | 2003 |
| octocog alfa                                     | Advate                               | hemophilia A                                                               | 2003 |
| laronidase                                       | Aldurazyme                           | Hurler syndrome                                                            | 2003 |
| agalsidase beta                                  | Fabrazyme                            | Fabry disease                                                              | 2003 |
| efalizumab                                       | Raptiva                              | psoriasis                                                                  | 2003 |
| omalizumab                                       | Xolair                               | asthma                                                                     | 2003 |
| tositumomab and iodine 1131 tositumomab          | Bexxar                               | non-Hodgkin's lymphoma                                                     | 2003 |
| palifermin                                       | Kepivance                            | oral mucositis                                                             | 2004 |
| lutropin alfa                                    | Luveris                              | infertility                                                                | 2004 |
| lutropin alfa menotropin                         | Menopur                              | infertility                                                                | 2004 |
| follitropin beta                                 | Follistim                            | infertility                                                                | 2004 |
| hyaluronidase, bovine testicular origin          | Amphadase                            | adjuvant to increase the absorption and dispersion of other injected drugs | 2004 |
| hyaluronidase, ovine testicular origin           | Vitrase                              | hypodermoclysis                                                            | 2004 |
| insulin glulisine                                | Apidra                               | diabetes                                                                   | 2004 |
| natalizumab                                      | Tysabri                              | MS, Crohn's disease                                                        | 2004 |
| cetuximab                                        | Erbix                                | colorectal cancer                                                          | 2004 |
| bevacizumab                                      | Avastin                              | colorectal cancer                                                          | 2004 |
| mecasermin                                       | Increlex                             | severe primary insulin-like growth factor deficiency                       | 2005 |

|                                                            |                            |                                                                            |      |
|------------------------------------------------------------|----------------------------|----------------------------------------------------------------------------|------|
| abatacept                                                  | Orencia                    | rheumatoid arthritis                                                       | 2005 |
| mecasermin rinfabate                                       | Iplex                      | GH deficiency (growth hormone)                                             | 2005 |
| galsulfase                                                 | Naglazyme                  | Maroteaux-Lamy syndrome                                                    | 2005 |
| hyaluronidase, human recombinant                           | Hylenex                    | adjuvant agent to enhance drug delivery                                    | 2005 |
| hyaluronidase, bovine testicular origin                    | Hydase                     | adjuvant to increase the absorption and dispersion of other injected drugs | 2005 |
| insulin detemir                                            | Levemir                    | diabetes                                                                   | 2005 |
| alglucosidase alfa                                         | Myozyme                    | Pompe disease                                                              | 2006 |
| growth hormone, human recombinant (somatotropin)           | Omnitrope                  | GH deficiency                                                              | 2006 |
| idursulfase                                                | Elaprase                   | Hunter syndrome                                                            | 2006 |
| insulin, human recombinant                                 | Exubera<br>Inhaled Insulin | diabetes                                                                   | 2006 |
| ranibizumab                                                | Lucentis                   | age-related macular degeneration (AMD), Wet                                | 2006 |
| panitumumab                                                | Vectibix                   | colorectal cancer                                                          | 2006 |
| thyrotropin alfa                                           | Thyrogen                   | thyroid cancer                                                             | 2007 |
| growth hormone, human recombinant (somatotropin)           | Valtropin                  | GH deficiency                                                              | 2007 |
| peg-erythropoietin beta                                    | Mircera                    | anemia, renal failure                                                      | 2007 |
| eculizumab                                                 | Soliris                    | paroxysmal nocturnal hemoglobinuria                                        | 2007 |
| moroctocog alfa                                            | Xyntha                     | hemophilia A                                                               | 2008 |
| growth hormone, human recombinant (somatotropin)           | Accretropin                | Turner syndrome                                                            | 2008 |
| rilonacept                                                 | Arcalyst                   | Muckle-Wells syndrome                                                      | 2008 |
| romiplostim                                                | Nplate                     | idiopathic thrombocytopenic purpura                                        | 2008 |
| C1-inhibitor, human plasma-derived (C1 esterase inhibitor) | Cinryze                    | angioedema, hereditary prophylaxis                                         | 2008 |
| factor IIa, human recombinant (thrombin)                   | Recothrom                  | hemostasis                                                                 | 2008 |
| certolizumab pegol                                         | Cimzia                     | Crohn's disease                                                            | 2008 |
| Interferon- $\beta$ 1b (rIFN- $\beta$ )                    | Betaseron,<br>Extavia      | MS                                                                         | 2009 |
| antithrombin alfa                                          | ATryn                      | antithrombin III deficiency                                                | 2009 |
| ecallantide                                                | Kalbitor                   | angioedema, hereditary                                                     | 2009 |
| abobotulinumtoxin A                                        | Dysport                    | skin wrinkles                                                              | 2009 |
| incobotulinumtoxinA                                        | Xeomin                     | sialorrhea                                                                 | 2009 |
| C1-inhibitor, human plasma-derived (C1 esterase inhibitor) | Berinerter                 | angioedema                                                                 | 2009 |

|                                         |             |                                            |      |
|-----------------------------------------|-------------|--------------------------------------------|------|
| lipase<br>protease<br>amylase           | Creon       | exocrine pancreatic insufficiency          | 2009 |
| lipase<br>protease<br>amylase           | Zenpep      | exocrine pancreatic insufficiency          | 2009 |
| ustekinumab                             | Stelara     | Crohn's disease                            | 2009 |
| ofatumumab                              | Arzerra     | cancer, chronic lymphocytic leukemia (CLL) | 2009 |
| canakinumab                             | Ilaris      | cryopyrin-associated periodic syndromes    | 2009 |
| golimumab                               | Simponi     | psoriatic arthritis                        | 2009 |
| velaglucerase alfa                      | VPRIV       | Gaucher's disease                          | 2010 |
| alglucosidase alfa                      | Lumizyme    | Pompe disease                              | 2010 |
| lipase<br>protease<br>amylase           | Pancreaze   | exocrine pancreatic insufficiency          | 2010 |
| pegloticase                             | Krystexxa   | gout                                       | 2010 |
| collagenase AUX-I<br>collagenase AUX-II | Xiaflex     | dupuytren's disease                        | 2010 |
| tocilizumab                             | Actemra     | rheumatoid arthritis                       | 2010 |
| denosumab                               | Prolia      | osteoporosis                               | 2010 |
| denosumab                               | Xgeva       | bone diseases                              | 2010 |
| belatacept                              | Nulojix     | transplant rejection                       | 2011 |
| aflibercept                             | Eylea       | diabetic retinopathy                       | 2011 |
| factor XIII, human                      | Corifact    | coagulopathy                               | 2011 |
| asparaginase Erwinia chrysanthemi       | Erwinaze    | acute lymphoblastic leukemia               | 2011 |
| belimumab                               | Benlysta    | systemic lupus erythematosus               | 2011 |
| ipilimumab                              | Yervoy      | Melanoma                                   | 2011 |
| brentuximab vedotin                     | Adcetris    | cancer, anaplastic large cell lymphoma     | 2011 |
| tbo-filgrastim                          | Granix      | neutropenia                                | 2012 |
| taliglucerase alfa                      | Elelyso     | Gaucher's disease                          | 2012 |
| ocriplasmin                             | Jetrea      | vitreomacular adhesion                     | 2012 |
| aflibercept                             | Zaltrap     | cancer, colorectal, metastatic             | 2012 |
| glucarpidase                            | Voraxaze    | chemo side effects (methotrexate overdose) | 2012 |
| lipase<br>protease<br>amylase           | Viokace     | exocrine pancreatic insufficiency          | 2012 |
| lipase<br>protease<br>amylase           | Ultresa     | exocrine pancreatic insufficiency          | 2012 |
| lipase<br>protease<br>amylase           | Pertzye     | exocrine pancreatic insufficiency          | 2012 |
| pertuzumab                              | Perjeta     | breast cancer                              | 2012 |
| raxibacumab                             | Raxibacumab | anthrax                                    | 2012 |



|                                                  |                            |                                                        |      |
|--------------------------------------------------|----------------------------|--------------------------------------------------------|------|
| nonacog gamma                                    | Rixubis                    | hemophilia B                                           | 2013 |
| turoctocog alfa                                  | NovoEight                  | hemophilia A                                           | 2013 |
| catridecacog                                     | Tretten                    | thrombosis                                             | 2013 |
| obinutuzumab                                     | Gazyva                     | cancer, CLL                                            | 2013 |
| trastuzumab emtansine                            | Kadcyla                    | breast cancer                                          | 2013 |
| interferon- $\beta$ 1a (rIFN- $\beta$ )          | Avonex,<br>Plegridy, Rebif | MS                                                     | 2014 |
| elosulfase alfa                                  | Vimizim                    | Morquio syndrome                                       | 2014 |
| efmoroctocog alfa                                | Eloctate                   | hemophilia A                                           | 2014 |
| susoctocog alfa                                  | Obizur                     | hemophilia A                                           | 2014 |
| conestat alfa                                    | Ruconest                   | angioedema                                             | 2014 |
| eftrenonacog alfa                                | Alprolix                   | hemophilia B                                           | 2014 |
| metreleptin                                      | Myalept                    | lipodystrophy                                          | 2014 |
| albiglutide                                      | Tanzeum                    | diabetes                                               | 2014 |
| dulaglutide                                      | Trulicity                  | diabetes                                               | 2014 |
| insulin, human recombinant                       | Afrezza Inhaled Insulin    | diabetes                                               | 2014 |
| ramucirumab                                      | Cyramza                    | stomach cancer                                         | 2014 |
| vedolizumab                                      | Entyvio                    | Crohn's disease                                        | 2014 |
| blinatumomab                                     | Blinicyto                  | acute lymphoblastic leukemia                           | 2014 |
| nivolumab                                        | Opdivo                     | melanoma                                               | 2014 |
| pembrolizumab                                    | Keytruda                   | cancer, non-small cell lung cancer (NSCLC), metastatic | 2014 |
| siltuximab                                       | Sylvant                    | Castleman's disease                                    | 2014 |
| asfotase alfa                                    | Strensiq                   | hypophosphatasia                                       | 2015 |
| filgrastim-sndz                                  | Zarxio                     | neutropenia                                            | 2015 |
| sebelipase alfa                                  | Kanuma                     | lysosomal acid lipase deficiency                       | 2015 |
| trenonacog alfa                                  | Ixinity                    | hemophilia B                                           | 2015 |
| rurioctocog alfa pegol                           | Adynovate                  | hemophilia A                                           | 2015 |
| simoctocog alfa                                  | Nuwiq                      | hemophilia A                                           | 2015 |
| growth hormone, human recombinant (somatotropin) | Zomacton                   | GH deficiency, child                                   | 2015 |
| parathyroid hormone, human recombinant           | Natpara                    | hypocalcemia                                           | 2015 |
| lipase                                           | RELiZORB                   | exocrine pancreatic insufficiency                      | 2015 |
| insulin degludec                                 | Tresiba                    | diabetes                                               | 2015 |
| insulin glargine                                 | Basaglar                   | diabetes                                               | 2015 |
| insulin glargine                                 | Toujeo                     | diabetes                                               | 2015 |
| insulin aspart                                   | Ryzodeg                    | diabetes                                               | 2015 |
| necitumumab                                      | Portrazza                  | cancer, NSCLC                                          | 2015 |
| mepolizumab                                      | Nucala                     | asthma                                                 | 2015 |
| evolocumab                                       | Repatha                    | hyperlipidemia                                         | 2015 |
| elotuzumab                                       | Empliciti                  | multiple myeloma                                       | 2015 |
| daratumumab                                      | Darzalex                   | cancer, multiple myeloma                               | 2015 |
| alirocumab                                       | Praluent                   | high cholesterol, familial heterozygous                | 2015 |
| idarucizumab                                     | Praxbind                   | coagulopathy                                           | 2015 |
| secukinumab                                      | Cosentyx                   | psoriasis                                              | 2015 |

|                                                            |                |                                           |      |
|------------------------------------------------------------|----------------|-------------------------------------------|------|
| dinutuximab                                                | Unituxin       | neuroblastoma                             | 2015 |
| lonococog alfa                                             | Afstyla        | hemophilia A                              | 2016 |
| albutrepenonacog alfa                                      | Idelvion       | hemophilia B                              | 2016 |
| etanercept-szszs                                           | Erelzi         | arthritis                                 | 2016 |
| octocog alfa                                               | Kovaltry       | hemophilia A                              | 2016 |
| insulin glargine and lixisenatide                          | Soliqua        | diabetes                                  | 2016 |
| liraglutide                                                | Xultophy       | diabetes                                  | 2016 |
| adalimumab-atto                                            | Amjevita       | rheumatoid arthritis                      | 2016 |
| bezlotoxumab                                               | Zinplava       | infections, <i>Clostridium difficile</i>  | 2016 |
| ixekizumab                                                 | Taltz          | psoriasis                                 | 2016 |
| atezolizumab                                               | Tecentriq      | cancer, NSCLC                             | 2016 |
| infliximab-dyyb                                            | Inflectra      | Crohn's disease                           | 2016 |
| daclizumab beta                                            | Zinbryta       | MS                                        | 2016 |
| reslizumab                                                 | Cinqair        | asthma                                    | 2016 |
| olaratumab                                                 | Lartruvo       | cancer, soft tissue sarcoma               | 2016 |
| obiltoxaximab                                              | Anthim         | infections, anthrax                       | 2016 |
| cerliponase alfa                                           | Brineura       | Batten disease                            | 2017 |
| vestronidase alfa-vjvk                                     | Mepsevii       | mucopolysaccharidosis                     | 2017 |
| nonacog beta pegol                                         | Rebinyn        | hemophilia B                              | 2017 |
| thrombin, human chondroitin sulfate collagen               | Hemoblast      | hemostasis                                | 2017 |
| keratin, human derived                                     | KeraStat       | radiation side effects wound care         | 2017 |
| C1-inhibitor, human plasma-derived (C1 esterase inhibitor) | Haegarda       | angioedema                                | 2017 |
| insulin aspart                                             | Fiasp          | diabetes                                  | 2017 |
| Insulin lispro                                             | Admelog        | diabetes                                  | 2017 |
| bevacizumab-awwb                                           | Mvasi          | colorectal cancer                         | 2017 |
| trastuzumab-dkst                                           | Ogivri         | breast cancer                             | 2017 |
| adalimumab-adbm                                            | Cyltezo        | rheumatoid arthritis                      | 2017 |
| ocrelizumab                                                | Ocrevus        | MS, relapsing remitting                   | 2017 |
| guselkumab                                                 | Tremfya        | psoriasis                                 | 2017 |
| benralizumab                                               | Fasenra        | asthma                                    | 2017 |
| dupilumab                                                  | Dupixent       | asthma                                    | 2017 |
| durvalumab                                                 | Imfinzi        | cancer, NSCLC                             | 2017 |
| sarilumab                                                  | Kevzara        | rheumatoid arthritis                      | 2017 |
| avelumab                                                   | Bavencio       | cancer, Merkel cell carcinoma, metastatic | 2017 |
| emicizumab-kxwh                                            | Hemlibra       | hemophilia A                              | 2017 |
| rituximab                                                  | Rituxan Hycela | follicular lymphoma                       | 2017 |
| infliximab-abda                                            | Renflexis      | follicular lymphoma                       | 2017 |
| Infliximab-qbtx                                            | Ixifi          | Crohn's disease                           | 2017 |
| brodalumab                                                 | Siliq          | psoriasis                                 | 2017 |
| inotuzumab ozogamicin                                      | Besponsa       | acute lymphoblastic leukemia              | 2017 |

|                               |           |                                                                            |      |
|-------------------------------|-----------|----------------------------------------------------------------------------|------|
| gemtuzumab<br>ozogamicin      | Mylotarg  | cancer, acute myeloid leukemia                                             | 2017 |
| insulin glargine              | Lusduna   | diabetes                                                                   | 2017 |
| filgrastim-aafi               | Nivestym  | neutropenia                                                                | 2018 |
| pegfilgrastim-cbqv            | Udenyca   | neutropenia                                                                | 2018 |
| pegfilgrastim-jmdb            | Fulphila  | neutropenia                                                                | 2018 |
| andexanet alfa                | Andexxa   | anticoagulation reversal                                                   | 2018 |
| voncog alfa                   | Vonvendi  | von Willebrand disease                                                     | 2018 |
| epoetin alfa-epbx             | Retacrit  | snemia                                                                     | 2018 |
| cenegermin-bkbj               | Oxervate  | eye diseases, corneal<br>(neurotrophic keratitis)                          | 2018 |
| tagraxofusp-erzs              | Elzonris  | cancer, BPDCN (blastic<br>plasmacytoid dendritic cell<br>neoplasm)         | 2018 |
| calaspargase pegol-<br>mknl   | Asparlas  | acute lymphoblastic leukemia                                               | 2018 |
| pegvaliase-pqpz               | Palynziq  | phenylketonuria                                                            | 2018 |
| elapegademase-lvlr            | Revcovi   | SCID (severe combined<br>immunodeficiency)                                 | 2018 |
| trastuzumab-pkrb              | Herzuma   | breast cancer                                                              | 2018 |
| adalimumab-adaz               | Hyrimoz   | rheumatoid arthritis                                                       | 2018 |
| galcanezumab-gnlm             | Emgality  | migraine                                                                   | 2018 |
| cemiplimab-rwlc               | Libtayo   | cancer, basal cell metastatic                                              | 2018 |
| ravulizumab-cwvz              | Ultomiris | paroxysmal nocturnal<br>hemoglobinuria                                     | 2018 |
| rituximab-abbs                | Truxima   | non-Hodgkin's lymphoma                                                     | 2018 |
| ibalizumab-uyk                | Trogarzo  | infections, HIV/AIDS                                                       | 2018 |
| fremanezumab-vfrm             | Ajovy     | migraine                                                                   | 2018 |
| lanadelumab-flyo              | Takhzyro  | angioedema                                                                 | 2018 |
| tildrakizumab-asmn            | Ilumya    | psoriasis                                                                  | 2018 |
| erenumab-aooe                 | Aimovig   | migraine                                                                   | 2018 |
| mogamulizumab-kpkc            | Poteligeo | mycosis fungoides                                                          | 2018 |
| burosumab-twza                | Crysvita  | X-linked hypophosphatemia                                                  | 2018 |
| emapalumab-lzsg               | Gamifant  | genetic disorders<br>(hemophagocytic<br>lymphohistiocytosis)               | 2018 |
| moxetumomab<br>pasudotox-tdfk | Lumoxiti  | hairy cell leukemia                                                        | 2018 |
| pegfilgrastim-bmez            | Ziextenzo | neutropenia                                                                | 2019 |
| turoctocog alfa pegol         | Esperoct  | hemophilia A                                                               | 2019 |
| etanercept-ykro               | Eticovo   | arthritis                                                                  | 2019 |
| luspatercept-aamt             | Reblozyl  | anemia                                                                     | 2019 |
| prabotulinumtoxinA-<br>xvfs   | Jeuveau   | skin wrinkles                                                              | 2019 |
| insulin, human<br>recombinant | Myxredlin | diabetes                                                                   | 2019 |
| bevacizumab-bvzr              | Zirabev   | colorectal cancer, glioblastoma<br>multiforme, hepatocellular<br>carcinoma | 2019 |

|                                              |           |                                                                                 |      |
|----------------------------------------------|-----------|---------------------------------------------------------------------------------|------|
| trastuzumab-anns                             | Kanjinti  | breast cancer                                                                   | 2019 |
| trastuzumab-dttb                             | Ontruzant | breast cancer                                                                   | 2019 |
| trastuzumab-qyyp                             | Trazimera | breast cancer                                                                   | 2019 |
| adalimumab-afzb                              | Abrilada  | rheumatoid arthritis                                                            | 2019 |
| adalimumab-bwwd                              | Hadlima   | rheumatoid arthritis                                                            | 2019 |
| adalimumab-afzb                              | Abrilada  | rheumatoid arthritis                                                            | 2019 |
| caplacizumab-yhdp                            | Cablivi   | thrombotic thrombocytopenic purpura                                             | 2019 |
| risankizumab-rzaa                            | Skyrizi   | psoriasis                                                                       | 2019 |
| brolocizumab-dbll                            | Beovu     | wet macular degeneration                                                        | 2019 |
| rituximab-pvvr                               | Ruxience  | non-Hodgkin's Lymphoma                                                          | 2019 |
| infliximab-axxq                              | Avsola    | rheumatoid arthritis                                                            | 2019 |
| romosozumab-aqqg                             | Evenity   | osteoporosis                                                                    | 2019 |
| crizanlizumab-tmca                           | Adakveo   | prevention of vaso-occlusive crises (VOCs) in patients with sickle cell disease | 2019 |
| fam-trastuzumab<br>deruxtecan-nxki           | Enhertu   | breast cancer                                                                   | 2019 |
| polatuzumab vedotin-<br>piiq                 | Polivy    | cancer, DLBCL diffuse large B-cell lymphoma                                     | 2019 |
| enfortumab vedotin-ejfv                      | Padcev    | cancer, renal transitional cell carcinoma                                       | 2019 |
| pegfilgrastim-apgf                           | Nyvepria  | neutropenia                                                                     | 2020 |
| activated eptacog beta                       | Sevenfact | hemophilia A                                                                    | 2020 |
| somapacitan-beco                             | Sogroya   | GH deficiency, adult (growth hormone deficiency)                                | 2020 |
| peanut arachis<br>hypogaea Allergen-<br>dnfp | Palforzia | peanut allergy                                                                  | 2020 |
| collagenase clostridium<br>histolyticum-aaes | Qwo       | cellulite                                                                       | 2020 |
| insulin lispro                               | Lyumjev   | diabetes                                                                        | 2020 |
| insulin glargine-yfgn                        | Semglee   | diabetes                                                                        | 2020 |
| trastuzumab                                  | Phesgo    | breast cancer                                                                   | 2020 |
| adalimumab-fkjp                              | Hulio     | rheumatoid arthritis                                                            | 2020 |
| satralizumab                                 | Enspryng  | neuromyelitis optica                                                            | 2020 |
| ofatumumab                                   | Kesimpta  | MS, relapsing remitting                                                         | 2020 |
| tafasitamab                                  | Monjuvi   | cancer, DLBCL diffuse large B-cell lymphoma                                     | 2020 |
| naxitamab-ggqk                               | Danyelza  | neuroblastoma                                                                   | 2020 |
| eptinezumab-jjmr                             | Vyepti    | migraine                                                                        | 2020 |
| rituximab-arrx                               | Riabni    | non-Hodgkin's lymphoma                                                          | 2020 |
| teprotumumab-trbw                            | Tepezza   | thyroid eye disease                                                             | 2020 |
| ansuvimab-zykl                               | Ebanga    | infections, Ebola                                                               | 2020 |
| inebilizumab-cdon                            | Uplizna   | neuromyelitis optica                                                            | 2020 |
| margetuximab-cmkb                            | Margenza  | breast cancer                                                                   | 2020 |
| isatuximab-irfc                              | Sarclisa  | cancer, multiple myeloma                                                        | 2020 |

|                                              |            |                                                |      |
|----------------------------------------------|------------|------------------------------------------------|------|
| atoltivimab<br>odesivimab-ebgn<br>maftivimab | Inmazed    | infections, Ebola                              | 2020 |
| sacituzumab<br>govitecan-hziy                | Trodelvy   | cancer, breast, triple-negative,<br>metastatic | 2020 |
| ropeginterferon alfa-2b                      | Besremi    | polycythemia vera                              | 2021 |
| efgartigimod alfa                            | Vyvgart    | myasthenia gravis                              | 2021 |
| avalglucosidase alfa                         | Nexviazyme | Pompe disease                                  | 2021 |
| lonapegsomatropin-<br>tcgd                   | Skytrofa   | GH deficiency                                  | 2021 |
| asparaginase erwinia<br>chrysanthemi-rywn    | Rylaze     | acute lymphoblastic leukemia                   | 2021 |
| insulin glargine-aglr                        | Rezvoglar  | diabetes                                       | 2021 |
| adalimumab-aqvh                              | Yusimry    | rheumatoid arthritis                           | 2021 |
| ranibizumab                                  | Susvimo    | AMD, wet                                       | 2021 |
| ranibizumab-nuna                             | Byooviz    | macular degeneration                           | 2021 |
| anifrolumab                                  | Saphnelo   | systemic lupus erythematosus                   | 2021 |
| tralokinumab                                 | Adbry      | atopic dermatitis                              | 2021 |
| evinacumab-dqnb                              | Evkeeza    | high cholesterol                               | 2021 |
| tezepelumab-ekko                             | Tezspire   | asthma                                         | 2021 |
| dostarlimab                                  | Jemperli   | cancer, solid                                  | 2021 |
| amivantamab-vmjw                             | Rybrevant  | cancer, NSCLC                                  | 2021 |
| aducanumab-avwa                              | Aduhelm    | Alzheimer's disease                            | 2021 |
| tisotumab vedotin                            | Tivdak     | cervical cancer                                | 2021 |
| belantamab mafodotin                         | Blenrep    | cancer, multiple myeloma                       | 2021 |
| loncastuximab tesirine-<br>lpyl              | Zynlonta   | cancer, DLBCL                                  | 2021 |
| filgrastim-ayow                              | Releuko    | neutropenia                                    | 2022 |
| tebentafusp-tebn                             | Kimmtrak   | cancer, uveal melanoma<br>metastatic           | 2022 |
| bevacizumab-maly                             | Alymsys    | colorectal cancer                              | 2022 |
| nivolumab/ relatlimab-<br>rmbw               | Opdualag   | melanoma                                       | 2022 |
| sutimlimab-jome                              | Enjaymo    | cold agglutinin disease                        | 2022 |
| faricimab-svoa                               | Vabysmo    | diabetic macular edema                         | 2022 |
